# Supplementary material for: Crystal structure, luminescence properties, energy transfer, tunable occupation and thermal properties of a novel color-tunable phosphor NaBa1−zSrzB9O15:xCe3+,yMn2+
Source: Royal Society of Chemistry journal article supplement (doi:10.1039/c8dt02780c), 2018-01-01
Supplement: c8dt02780c1.pdf [file c8dt02780c1.pdf]

Table S1. The atomic coordinates, site occupancies and temperature factors of NBB: 0.03Ce<sup>3+</sup> samples

| Atoms | x      | y      | z      | Usio    | Occupy |
|-------|--------|--------|--------|---------|--------|
| Ba    | 0      | 0      | 0.0082 | 0.02491 | 1      |
| Na    | 0      | 0      | 0.2301 | 0.01275 | 1      |
| B1    | 0.3854 | 0.2710 | 0.0567 | 0.00257 | 1      |
| B2    | 0.4538 | 0.3987 | 0.1787 | 0.00132 | 1      |
| B3    | 0.2095 | 0.3127 | 0.1187 | 0.03596 | 1      |
| O1    | 0.4797 | 0.3384 | 0.1213 | 0.03203 | 1      |
| O2    | 0.2504 | 0.2494 | 0.0630 | 0.03903 | 1      |
| O3    | 0.2127 | 0.4265 | 0.0715 | 0.03898 | 1      |
| O4    | 0.3679 | 0.4212 | 0.1739 | 0.00756 | 1      |
| O5    | 0.0954 | 0.2337 | 0.1705 | 0.00562 | 1      |

Table S2. The atomic coordinates, site occupancies and temperature factors of NBB: 0.03Ce<sup>3+</sup>, 0.03Mn<sup>2+</sup> samples

| Atoms | x      | y      | z      | Usio    | Occupy |
|-------|--------|--------|--------|---------|--------|
| Ba    | 0      | 0      | 0.0047 | 0.02067 | 1      |
| Na    | 0      | 0      | 0.2212 | 0.01872 | 1      |
| B1    | 0.3964 | 0.2605 | 0.0554 | 0.02870 | 1      |

|           |               |               |               |                |          |
|-----------|---------------|---------------|---------------|----------------|----------|
| <b>B2</b> | <b>0.4363</b> | <b>0.4008</b> | <b>0.1836</b> | <b>0.03952</b> | <b>1</b> |
| <b>B3</b> | <b>0.2338</b> | <b>0.3603</b> | <b>0.1012</b> | <b>0.01612</b> | <b>1</b> |
| <b>O1</b> | <b>0.4726</b> | <b>0.3434</b> | <b>0.1179</b> | <b>0.00626</b> | <b>1</b> |
| <b>O2</b> | <b>0.2706</b> | <b>0.2492</b> | <b>0.0546</b> | <b>0.02157</b> | <b>1</b> |
| <b>O3</b> | <b>0.2067</b> | <b>0.4305</b> | <b>0.0643</b> | <b>0.01706</b> | <b>1</b> |
| <b>O4</b> | <b>0.3446</b> | <b>0.4174</b> | <b>0.1600</b> | <b>0.01133</b> | <b>1</b> |
| <b>O5</b> | <b>0.1165</b> | <b>0.2379</b> | <b>0.1595</b> | <b>0.03141</b> | <b>1</b> |

---

Fig.S1. Gaussian fitting results of Mn<sup>2+</sup> emission band in NBB: 0.03Ce<sup>3+</sup>, 0.03Mn<sup>2+</sup> (a); Mn1 and Mn2 shift evolution over the content of Mn<sup>2+</sup> in NBB: 0.03Ce<sup>3+</sup>, vMn<sup>2+</sup> (b).

Table S3. The atomic coordinates, site occupancies and temperature factors of  $\text{NB}_{0.6}\text{S}_{0.4}\text{B}$ :  $0.03\text{Ce}^{3+}$ ,  $0.03\text{Mn}^{2+}$  samples

| Atoms     | x             | y             | z             | Usio           | Occupy   |
|-----------|---------------|---------------|---------------|----------------|----------|
| <b>Ba</b> | <b>0</b>      | <b>0</b>      | <b>0.0054</b> | <b>0.03130</b> | <b>1</b> |
| <b>Na</b> | <b>0</b>      | <b>0</b>      | <b>0.2280</b> | <b>0.04693</b> | <b>1</b> |
| <b>B1</b> | <b>0.3522</b> | <b>0.2657</b> | <b>0.0696</b> | <b>0.05631</b> | <b>1</b> |
| <b>B2</b> | <b>0.4673</b> | <b>0.3693</b> | <b>0.1591</b> | <b>0.03521</b> | <b>1</b> |
| <b>B3</b> | <b>0.2343</b> | <b>0.3656</b> | <b>0.1254</b> | <b>0.01630</b> | <b>1</b> |

|           |               |               |               |                |          |
|-----------|---------------|---------------|---------------|----------------|----------|
| <b>O1</b> | <b>0.5011</b> | <b>0.3491</b> | <b>0.1163</b> | <b>0.02973</b> | <b>1</b> |
| <b>O2</b> | <b>0.2144</b> | <b>0.2387</b> | <b>0.0835</b> | <b>0.02251</b> | <b>1</b> |
| <b>O3</b> | <b>0.2106</b> | <b>0.4491</b> | <b>0.0772</b> | <b>0.01336</b> | <b>1</b> |
| <b>O4</b> | <b>0.3528</b> | <b>0.4087</b> | <b>0.1694</b> | <b>0.02355</b> | <b>1</b> |
| <b>O5</b> | <b>0.1095</b> | <b>0.2557</b> | <b>0.1614</b> | <b>0.03748</b> | <b>1</b> |

---

Table S4. Cell parameters (a/b, c) and volume (V) of NB<sub>1-z</sub>S<sub>z</sub>B: 0.03Ce<sup>3+</sup>

| <b>z</b>   | <b>a=b</b>    | <b>c</b>      | <b>V</b>       | <b>Rp</b>    | <b>Rwp</b>    | <b>χ<sup>2</sup></b> |
|------------|---------------|---------------|----------------|--------------|---------------|----------------------|
| <b>0</b>   | <b>11.102</b> | <b>17.392</b> | <b>1856.56</b> | <b>6.78%</b> | <b>8.99%</b>  | <b>2.67</b>          |
| <b>0.1</b> | <b>11.091</b> | <b>17.401</b> | <b>1853.81</b> | <b>6.38%</b> | <b>8.34%</b>  | <b>2.27</b>          |
| <b>0.2</b> | <b>11.074</b> | <b>17.424</b> | <b>1850.51</b> | <b>7.48%</b> | <b>9.80%</b>  | <b>2.55</b>          |
| <b>0.3</b> | <b>11.055</b> | <b>17.455</b> | <b>1846.85</b> | <b>8.05%</b> | <b>10.53%</b> | <b>3.67</b>          |
| <b>0.4</b> | <b>11.029</b> | <b>17.495</b> | <b>1842.88</b> | <b>8.74%</b> | <b>11.48%</b> | <b>4.56</b>          |

Table S5. The atomic coordinates, site occupancies and temperature factors of NB<sub>0.7</sub>S<sub>0.3</sub>B: 0.03Ce<sup>3+</sup> samples

| <b>Atoms</b> | <b>x</b>      | <b>y</b>      | <b>z</b>      | <b>Usio</b>    | <b>Occupy</b> |
|--------------|---------------|---------------|---------------|----------------|---------------|
| <b>Ba</b>    | <b>0</b>      | <b>0</b>      | <b>0.0043</b> | <b>0.02613</b> | <b>1</b>      |
| <b>Na</b>    | <b>0</b>      | <b>0</b>      | <b>0.2244</b> | <b>0.03509</b> | <b>1</b>      |
| <b>B1</b>    | <b>0.3796</b> | <b>0.2459</b> | <b>0.0602</b> | <b>0.03782</b> | <b>1</b>      |
| <b>B2</b>    | <b>0.4467</b> | <b>0.3670</b> | <b>0.1821</b> | <b>0.02881</b> | <b>1</b>      |
| <b>B3</b>    | <b>0.2199</b> | <b>0.3210</b> | <b>0.1254</b> | <b>0.00721</b> | <b>1</b>      |
| <b>O1</b>    | <b>0.4947</b> | <b>0.3431</b> | <b>0.1146</b> | <b>0.02805</b> | <b>1</b>      |
| <b>O2</b>    | <b>0.2295</b> | <b>0.2339</b> | <b>0.0650</b> | <b>0.00681</b> | <b>1</b>      |

|           |               |               |               |                |          |
|-----------|---------------|---------------|---------------|----------------|----------|
| <b>O3</b> | <b>0.2022</b> | <b>0.4242</b> | <b>0.0653</b> | <b>0.06140</b> | <b>1</b> |
| <b>O4</b> | <b>0.3439</b> | <b>0.4116</b> | <b>0.1643</b> | <b>0.04948</b> | <b>1</b> |
| <b>O5</b> | <b>0.1064</b> | <b>0.2502</b> | <b>0.1653</b> | <b>0.00616</b> | <b>1</b> |

---

Fig. S2. Emission spectra of  $\text{NB}_{1-x}\text{S}_x\text{B}: 0.03\text{Ce}^{3+}$  and emission intensity of  $\text{Ce}^{3+}$  as a function of  $\text{Sr}^{2+}$  content (a); Rietveld refinement results of  $\text{NB}_{0.7}\text{S}_{0.3}\text{B}: 0.03\text{Ce}^{3+}$  (b).

Fig.S3. Decay curves and lifetimes of  $\text{Ce}^{3+}$ , Mn1 and Mn2 in  $\text{NB}_{0.6}\text{S}_{0.4}\text{B}$ :  $0.03\text{Ce}^{3+}$ ,  $0.03\text{Mn}^{2+}$  at different temperature.
